# Supplementary material
Source: PubMed Central journal article supplement (PMC3505273)
Supplement: NIHMS391097-supplement-1.pdf [file NIHMS391097-supplement-1.pdf]

| Tissue | Parameter | Feeding Group | Gene          |               |               |              |                 |
|--------|-----------|---------------|---------------|---------------|---------------|--------------|-----------------|
|        |           |               |               |               |               |              |                 |
|        |           |               | <i>acca</i>   | <i>lpk</i>    | <i>glut2</i>  | <i>lgs</i>   | <i>mcad</i>     |
|        |           |               |               |               |               |              |                 |
| Liver  | Phase     | LP            | 8.40±1.03     | 7.56±1.05     | 4.76±0.90     | 4.27±0.33    | 3.32±1.52       |
|        |           | DP            | 20.12±1.17\$  | NS            | NS            | 12.71±0.55\$ | 10.82±1.91\$    |
|        |           |               |               |               |               |              |                 |
|        | Amplitude | LP            | 791.84±214.14 | 2821.1±777.96 | 1206.4±285.06 | 639.72±56.1  | 8704.22±3461.5  |
|        |           | DP            | 333.32±100.74 | NS            | NS            | 575.72±87.08 | 5737.86±2984.28 |

**Supplemental Table 1.** Influence of restricted feeding on the phase and amplitude of diurnal variations in expression of metabolic genes within liver. Mice were randomly assigned to dark phase (DP; n=21) or light phase (LP; n=23) restricted feeding groups. Data are reported as mean ± SEM. Phase is the zeitgeber time (ZT; in hours) at which the peak value in the oscillation occurs. Amplitude (i.e., peak-to-trough difference) units are mRNA molecules per ng total RNA. NS signifies not significant. \$, p<0.05 for DP versus LP fed mice.

| Tissue         | Parameter | Feeding Group | Gene         |                               |              |                  |               |
|----------------|-----------|---------------|--------------|-------------------------------|--------------|------------------|---------------|
|                |           |               |              |                               |              |                  |               |
|                |           |               | <i>dgat2</i> | <i>acc<math>\alpha</math></i> | <i>acsl1</i> | <i>atgl</i>      | <i>lipe</i>   |
|                |           |               |              |                               |              |                  |               |
| Epididymal Fat | Phase     | LP            | NS           | NS                            | NS           | NS               | NS            |
|                |           | DP            | 10.73±0.76   | 0.86±1.21                     | NS           | 22.01±1.25       | 23.16±1.30    |
|                |           |               |              |                               |              |                  |               |
|                | Amplitude | LP            | NS           | NS                            | NS           | NS               | NS            |
|                |           | DP            | 60604±12540  | 1746.64±577.54                | NS           | 14618.16±4913.26 | 573.98±204.28 |

**Supplemental Table 2.** Influence of restricted feeding on the phase and amplitude of diurnal variations in expression of metabolic genes within epididymal fat. Mice were randomly assigned to dark phase (DP; n=21) or light phase (LP; n=23) restricted feeding groups. Data are reported as mean ± SEM. Phase is the zeitgeber time (ZT; in hours) at which the peak value in the oscillation occurs. Amplitude (i.e., peak-to-trough difference) units are mRNA molecules per ng total RNA. NS signifies not significant. \$, p<0.05 for DP versus LP fed mice.

| Tissue               | Parameter | Feeding Group | Gene         |                |              |             |              |
|----------------------|-----------|---------------|--------------|----------------|--------------|-------------|--------------|
|                      |           |               |              |                |              |             |              |
|                      |           |               | <i>dgat2</i> | <i>pdk4</i>    | <i>glut4</i> | <i>mcad</i> | <i>mcpt1</i> |
|                      |           |               |              |                |              |             |              |
| Gastrocnemius Muscle | Phase     | LP            | NS           | 22.11±1.21     | NS           | NS          | NS           |
|                      |           | DP            | 17.64±1.19   | 10.17±1.44\$   | NS           | NS          | NS           |
|                      |           |               |              |                |              |             |              |
|                      | Amplitude | LP            | NS           | 2670.88±851.6  | NS           | NS          | NS           |
|                      |           | DP            | 457.58±137.1 | 1436.06±559.64 | NS           | NS          | NS           |

**Supplemental Table 3.** Influence of restricted feeding on the phase and amplitude of diurnal variations in expression of metabolic genes within gastrocnemius muscle. Mice were randomly assigned to dark phase (DP; n=21) or light phase (LP; n=23) restricted feeding groups. Data are reported as mean ± SEM. Phase is the zeitgeber time (ZT; in hours) at which the peak value in the oscillation occurs. Amplitude (i.e., peak-to-trough difference) units are mRNA molecules per ng total RNA. NS signifies not significant. \$, p<0.05 for DP versus LP fed mice.

| Tissue | Parameter | Feeding Group | Gene            |                 |              |             |              |
|--------|-----------|---------------|-----------------|-----------------|--------------|-------------|--------------|
|        |           |               |                 |                 |              |             |              |
|        |           |               | <i>dgat2</i>    | <i>pdk4</i>     | <i>glut4</i> | <i>mcad</i> | <i>mcpt1</i> |
|        |           |               |                 |                 |              |             |              |
| Heart  | Phase     | LP            | NS              | 22.78±1.07      | NS           | NS          | NS           |
|        |           | DP            | 16.62±1.02      | NS              | NS           | NS          | NS           |
|        |           |               |                 |                 |              |             |              |
|        | Amplitude | LP            | NS              | 16362.82±4757.3 | NS           | NS          | NS           |
|        |           | DP            | 4332.12±1080.14 | NS              | NS           | NS          | NS           |

**Supplemental Table 4.** Influence of restricted feeding on the phase and amplitude of diurnal variations in expression of metabolic genes within heart. Mice were randomly assigned to dark phase (DP; n=21) or light phase (LP; n=23) restricted feeding groups. Data are reported as mean ± SEM. Phase is the zeitgeber time (ZT; in hours) at which the peak value in the oscillation occurs. Amplitude (i.e., peak-to-trough difference) units are mRNA molecules per ng total RNA. NS signifies not significant. \$, p<0.05 for DP versus LP fed mice.
